# Supplementary material for: Glucose time in range and peripheral neuropathy in type 2 diabetes mellitus and chronic kidney disease
Source: PubMed Central journal article supplement — BMJ Open Diabetes Res Care. 2020 Jan 15;8(1):e000991. doi: 10.1136/bmjdrc-2019-000991 (PMC7039577; doi:10.1136/bmjdrc-2019-000991), 2020-01-15
Supplement: bmjdrc-2019-000991supp001.pdf [file bmjdrc-2019-000991supp001.pdf]

## APPENDIX A

Supplement Table 1. Associations of glycemia with distal peripheral neuropathy ascertained using alternative definitions

| <b>MNSI <math>\geq 2</math> or use of medications (n=69)</b> | <b>Unadjusted OR (95% CI)</b> | <b>p-value</b> | <b>Adjusted OR** (95% CI)</b> | <b>p-value</b> |
|--------------------------------------------------------------|-------------------------------|----------------|-------------------------------|----------------|
| Time in range (70-180 mg/dL) (per 10% lower)*                | 1.27 (1.03, 1.56)             | 0.025          | 1.24 (1.01, 1.54)             | 0.045          |
| Time above range (>180 mg/dL) (per 10% higher)*              | 1.25 (1.02, 1.53)             | 0.029          | 1.23 (1.00, 1.51)             | 0.054          |
| Percent coefficient of variations (per 6% higher [1SD])      | 1.28 (0.84, 1.94)             | 0.255          | 1.27 (0.82, 1.98)             | 0.281          |
| GMI (per 1% higher)                                          | 1.78 (1.03, 3.08)             | 0.038          | 1.68 (0.96, 2.93)             | 0.068          |
| HbA1c (per 1% or 11 mmol/mol higher)                         | 1.22 (0.92, 1.63)             | 0.175          | 1.15 (0.85, 1.56)             | 0.379          |
| Duration of diabetes (per 10 years longer)                   | 1.09 (0.72, 1.65)             | 0.691          | 1.15 (0.74, 1.79)             | 0.527          |
|                                                              |                               |                |                               |                |
| <b>MNSI <math>\geq 4</math> (n=44)</b>                       |                               |                |                               |                |
| Time in range (70-180 mg/dL) (per 10%                        | 1.22 (1.02, 1.46)             | 0.031          | 1.22 (1.01, 1.48)             | 0.040          |

|                                                      |                   |       |                   |       |
|------------------------------------------------------|-------------------|-------|-------------------|-------|
| lower)*                                              |                   |       |                   |       |
| Time above range (>180 mg/dL) (per 10% higher)*      | 1.22 (1.02, 1.45) | 0.030 | 1.22 (1.01, 1.47) | 0.038 |
| Coefficient of variations (per SD=0.06 mg/dL higher) | 1.58 (1.00, 2.48) | 0.049 | 1.62 (1.00, 2.61) | 0.049 |
| GMI (per 1% higher)                                  | 1.28 (0.98, 1.67) | 0.066 | 1.24 (0.93, 1.66) | 0.138 |
| HbA1c (per 1% or 11 mmol/mol higher)                 | 1.24 (0.84, 1.84) | 0.283 | 1.15 (0.76, 1.73) | 0.508 |
| Duration of diabetes (per 10 years longer)           | 1.07 (0.72, 1.59) | 0.747 | 1.27 (0.82, 1.97) | 0.289 |

Abbreviations: Michigan Neuropathy Screening Instrument (MNSI), glucose management indicator (GMI), HbA1c (hemoglobin A1c)

\*10% = 144 min/day

\*\* adjusted for age, gender, race
